# Supplementary material for: Electroreduction of dissolved carbon dioxide on roughened molybdenum microelectrodes
Source: Royal Society of Chemistry journal article supplement (doi:10.1039/d3ra05592b), 2023-01-01
Supplement: d3ra05592b1.pdf [file d3ra05592b1.pdf]

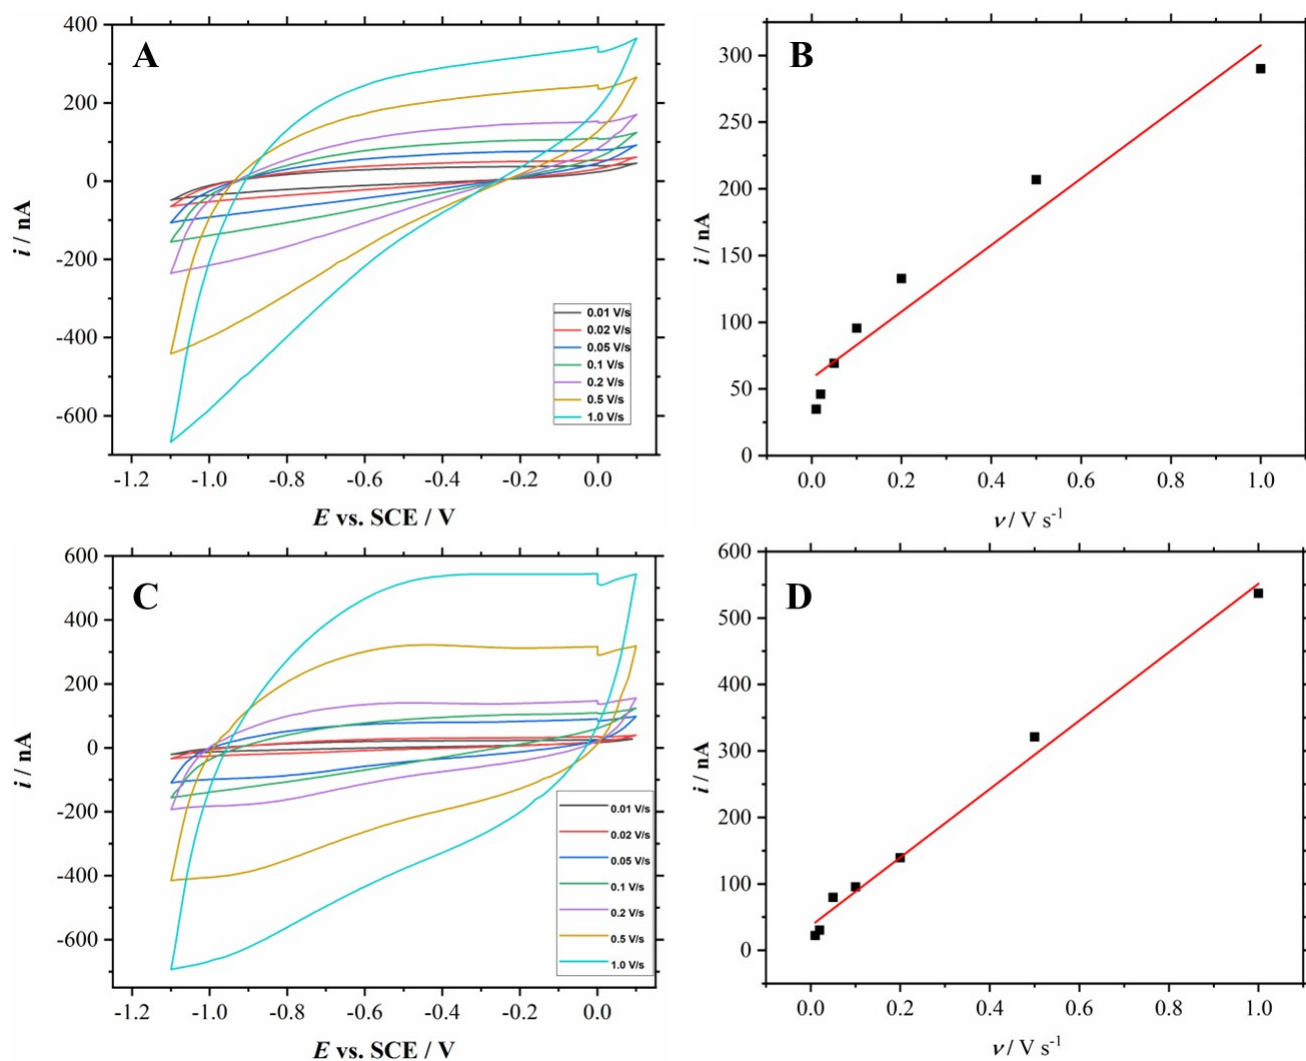

Figure S1: Cyclic voltammograms of smoothened (A) and roughened (C) Mo microdisk electrodes in  $N_2$ -saturated 0.5 M KCl at different scan rates: 0.01, 0.02, 0.05, 0.1, 0.2, 0.5, and 1  $V s^{-1}$ . Corresponding plots of current as a function of scan rate for the smoothened (B) and roughened (D) Mo microdisk electrodes. The currents were taken at around -0.2 V vs. SCE and the red lines resemble the fitting of the data.
